# Supplementary material for: Determination of X-ray detection limit and application in perovskite X-ray detectors
Source: Research Square preprint supplement (doi:10.21203/rs.3.rs-568088/v1), 2021-06-01
Supplement: Supplementary file 1 [file 9f674f1454db0482b7bbab7f.pdf]

## **Supplementary Information**

### **Determination of X-ray detection limit and application in perovskite X-ray detectors**

Lei Pan<sup>1</sup>, Shreetu Shrestha<sup>2</sup>, Neil Taylor<sup>1</sup>, Wanyi Nie<sup>2</sup> and Lei R. Cao<sup>1\*</sup>

*<sup>1</sup>Nuclear Engineering Program, Department of Mechanical and Aerospace Engineering, The Ohio State University, Columbus, Ohio, 43210, USA*

*<sup>2</sup>Center for Integrated Nanotechnology Materials Physics and Application Division, Los Alamos National Laboratory, Los Alamos, NM, 87545, USA*

\*Correspondence to: [cao.152@osu.edu](mailto:cao.152@osu.edu)

**Table S1. MAPbI<sub>3</sub> device dimensions**

|                                   | #1 Au/Au | #2 Pb/Au | #3 Pb/Au | #4 Pb/Au |
|-----------------------------------|----------|----------|----------|----------|
| MAPbI <sub>3</sub> thickness (mm) | 1.0      | 1.3      | 0.6      | 0.9      |
| Electrode area (mm <sup>2</sup> ) | 9.28     | 4.68     | 10.50    | 6.82     |
| Electrode thickness (nm)          | 100      | 100      | 100      | 100      |

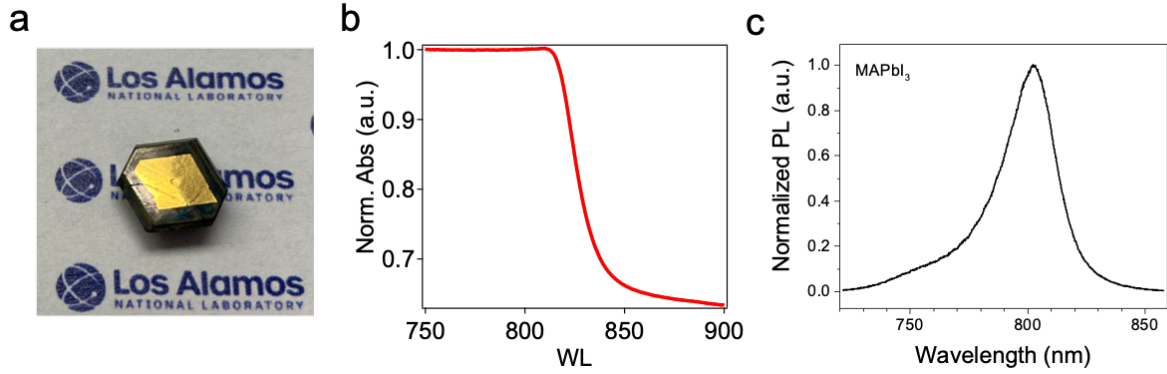

**Figure S1. MAPbI<sub>3</sub> Single crystal characterizations. a.** photo of a typical single crystal device. **b.** absorption spectrum and **c.** photoluminescence spectrum for MAPbI<sub>3</sub> single crystal.

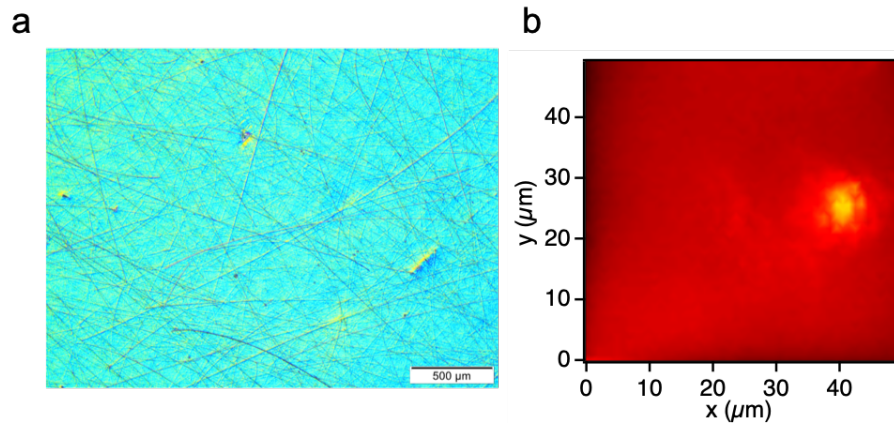

**Figure S2. Surface characterizations for the MAPbI<sub>3</sub> single crystal. a.** optical microscope image for MAPbI<sub>3</sub> single crystal's surface after polishing. **b.** photoluminescence height map for a typical crystal after polishing.

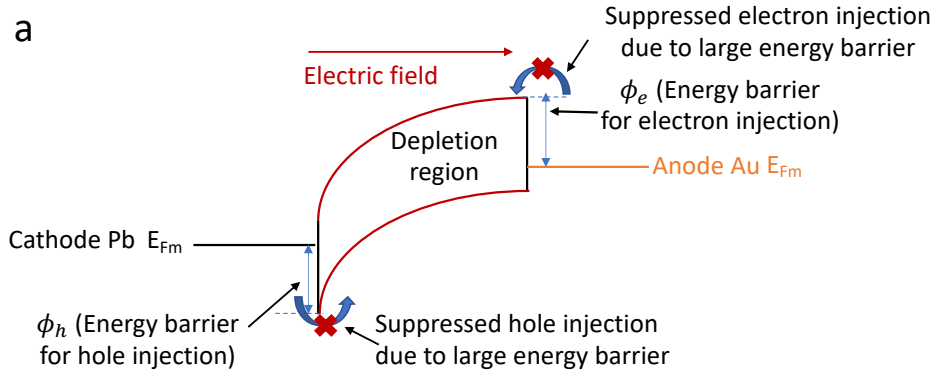

Energy band diagram of Pb/p-type MAPbI<sub>3</sub>/Au at reverse bias mode ( $E_{Fm}$ : metal Fermi level)

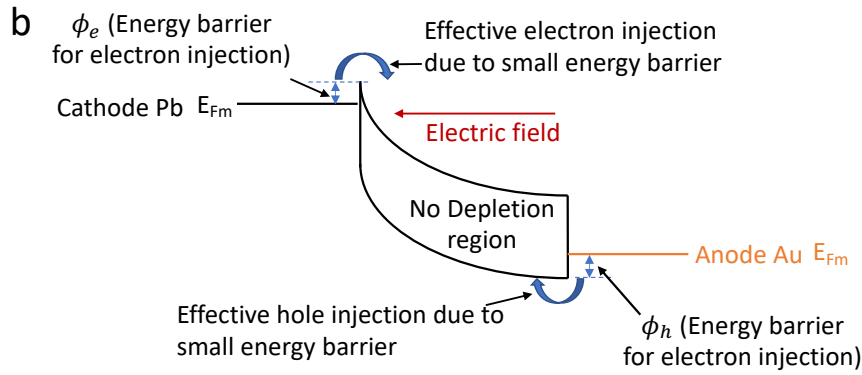

Energy band diagram of Pb/p-type MAPbI<sub>3</sub>/Au at forward bias mode

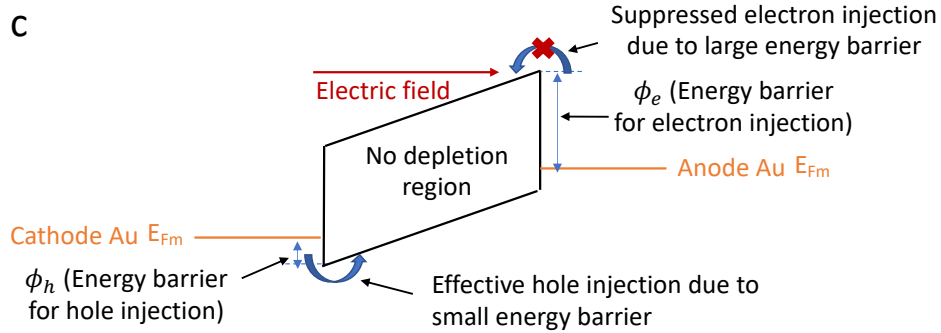

Energy band diagram of Au/p-type MAPbI<sub>3</sub>/Au

**Figure S3. Energy band diagram of different device architectures for charge injection analysis. a.** Pb/p-type MAPbI<sub>3</sub>/Au at reverse bias. **b.** Pb/p-type MAPbI<sub>3</sub>/Au at forward bias. **c.** Au/p-type MAPbI<sub>3</sub>/Au

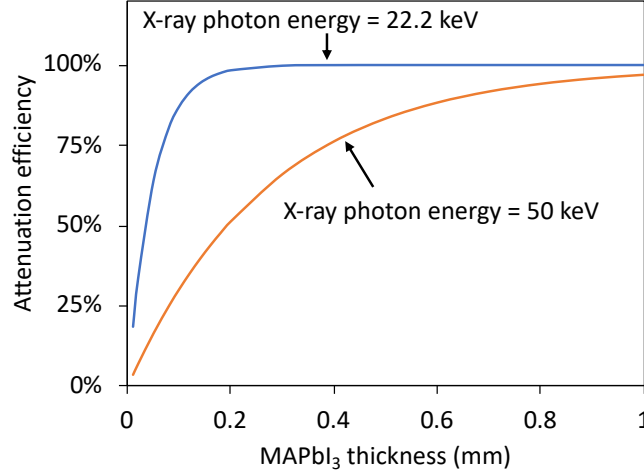

**Figure S4. X-ray photon attenuation in MAPbI<sub>3</sub> signal crystal.**

Attenuation efficiency =  $1 - e^{-(\frac{\mu}{\rho})\rho x}$ , where  $\frac{\mu}{\rho}$  is the mass attenuation coefficient of MAPbI<sub>3</sub>,  $\rho$  is the density of MAPbI<sub>3</sub>, and  $x$  is the MAPbI<sub>3</sub> single crystal thickness. The mass attenuation coefficient of MAPbI<sub>3</sub> can be calculated as  $(\frac{\mu}{\rho})_{MAPbI_3} = \sum_i w_i (\frac{\mu}{\rho})_i$  where  $w_i$  and  $(\frac{\mu}{\rho})_i$  are the fraction by weight and the mass attenuation coefficient of the  $i^{\text{th}}$  atomic constituent, respectively.

The attenuation efficiencies of MAPbI<sub>3</sub> to two X-ray photon energies are calculated. The 22.2 keV and 50 keV are the most probable energy and the maximum energy, respectively, of the X-ray tube used in this work (see **Figure S8**). It can be effectively treated that the charge carriers are generated at the surface of the MAPbI<sub>3</sub> single crystal due to the limited penetration depth of the X-ray photons, *i.e.*, less than 0.2 mm for 22.2 keV X-ray photons.

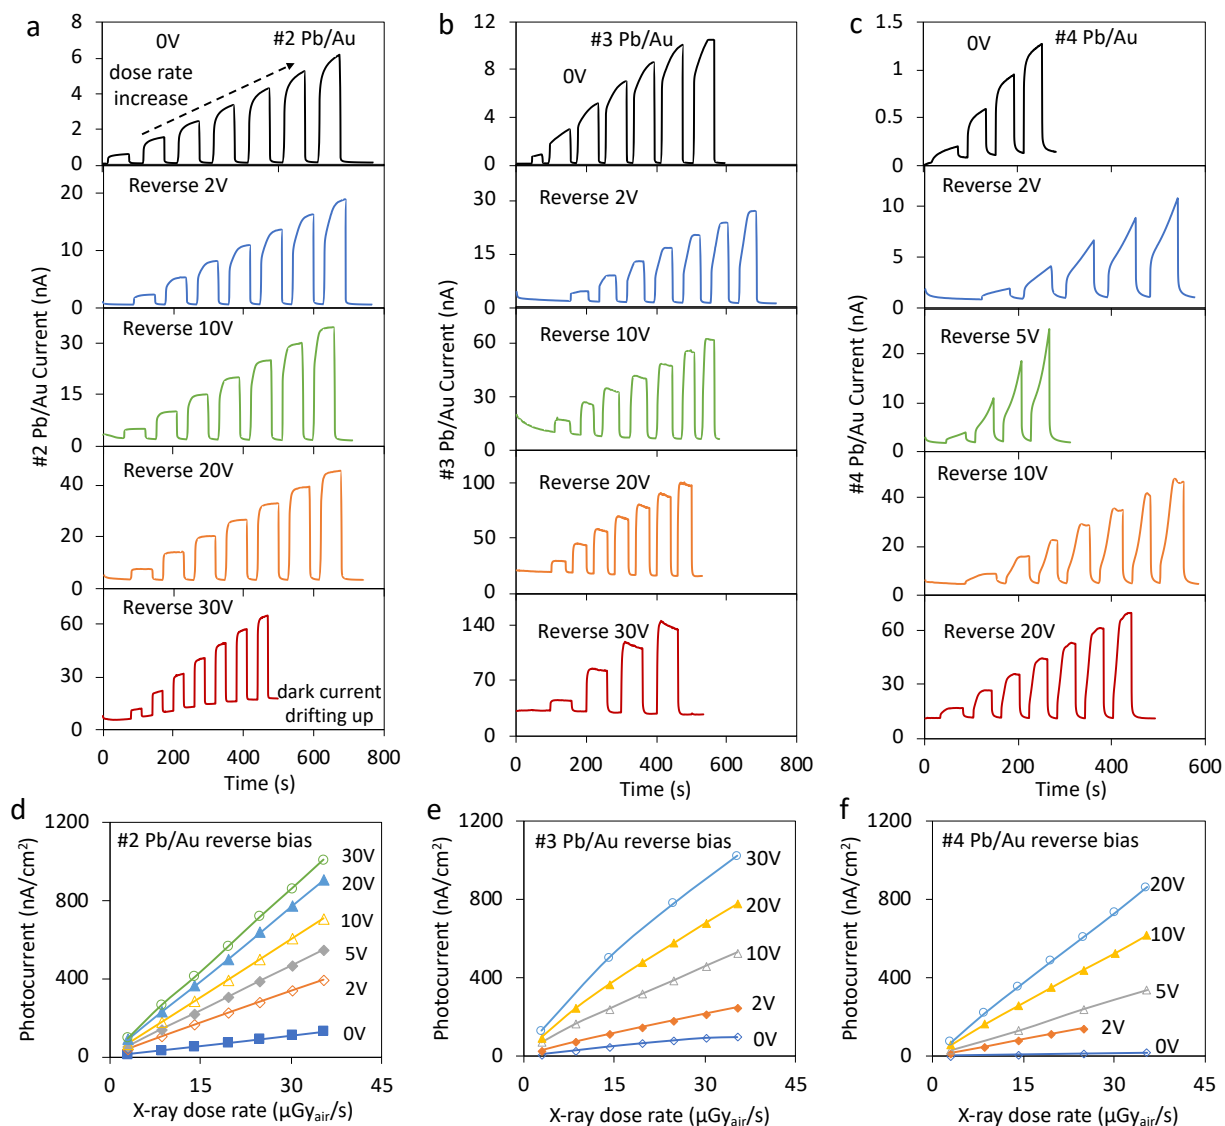

**Figure S5. Sensitivity measurement of reversely biased Pb/Au devices at charge collection mode.** Current response (hole-dominantly induced signal) of **a.** #2 Pb/Au device, **b.** #3 Pb/Au device **c.** #4 Pb/Au device, to increased X-ray dose rate in air at different reverse voltage. Photocurrent density as function of X-ray dose rate in air of **d.** #2 Pb/Au device, **e.** #3 Pb/Au device **f.** #4 Pb/Au device, at different reverse voltage.

Photocurrent is calculated as the difference between the signal current when X-ray is turned on and the dark current. sensitivity is obtained as the slope of linear fitting to photocurrent density as function of X-ray dose rate in air.

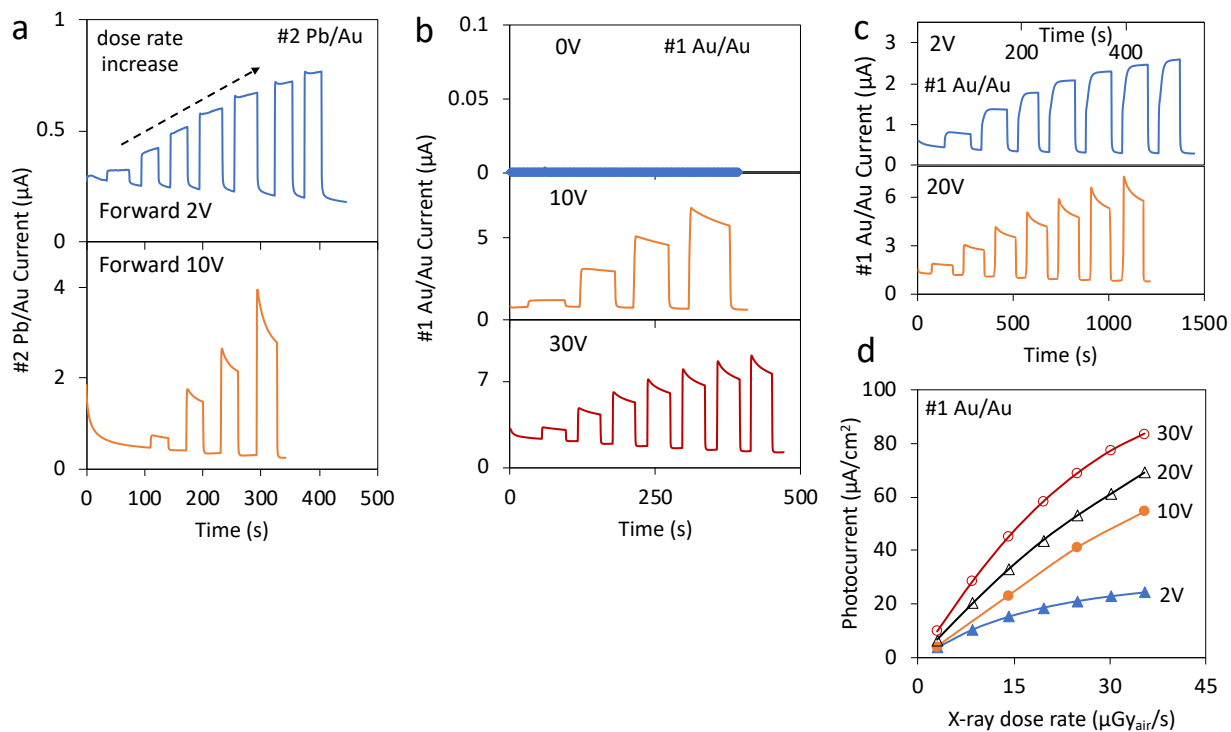

**Figure S6. Sensitivity measurement of forward biased Pb/Au devices and Au/Au device at charge injection mode.** Current response (hole-dominantly induced signal) of **a.** forward biased #2 Pb/Au device, **b. c.** #1 Au/Au device, to increased X-ray dose rate in air at different voltage. **d.** Photocurrent density as function of X-ray dose rate in air of #1 Au/Au device.

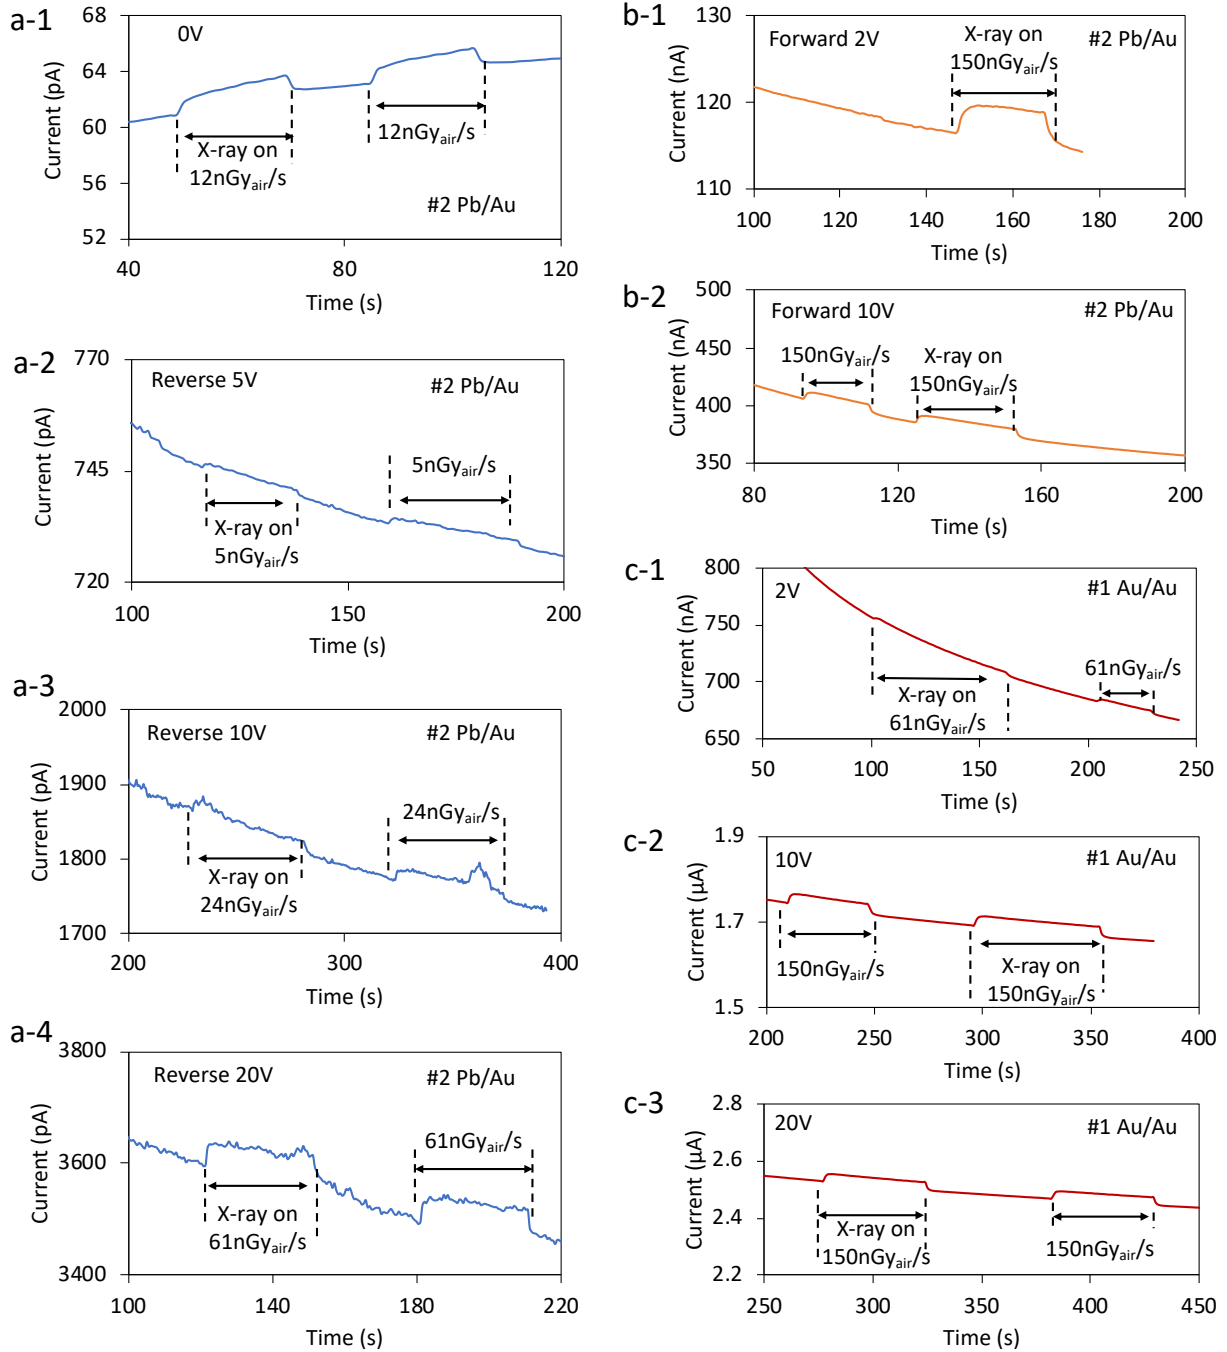

**Figure S7. Posterior check of the detectability.** **a.** Current response of reversely biased #2 Pb/Au device at different reverse voltage. The X-ray dose rate shown in the figures are confirmed to be detected by *posterior* check method, which supports the *prior* calculated detection limit. **b.** Current response of forward biased #2 Pb/Au device at different forward voltage. **c.** Current response of #1 Au/Au device at different voltage.

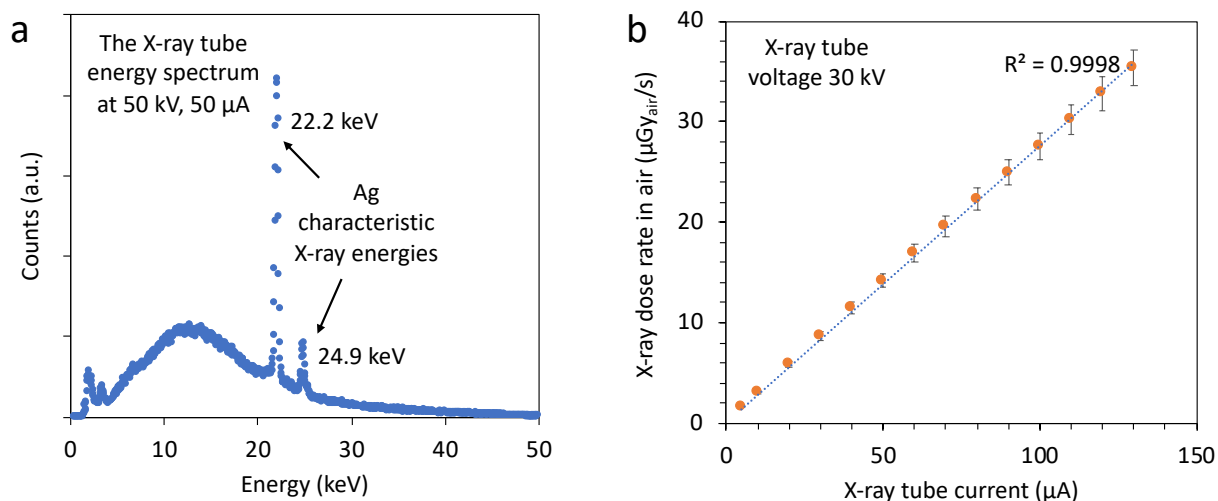

**Figure S8. X-ray tube ( with Ag target) energy spectrum and dose rate calibration** **a.** X-ray tube energy spectrum at tube voltage 50 kV and tube current of 50  $\mu$ A, measured by a Si P-I-N detector. **b.** X-ray tube dose rate in air at tube voltage 30 kV and different tube current from 5  $\mu$ A to 130  $\mu$ A. A dosimeter (Fluke Biomedical RaySafe 452) was used for dose rate calibration.

The X-ray tube has a most probable X-ray photon energy of 22.2 keV, corresponding to one of the Ag characteristic X-ray energies when the X-ray tube is operated at voltage higher than 22.2 kV.

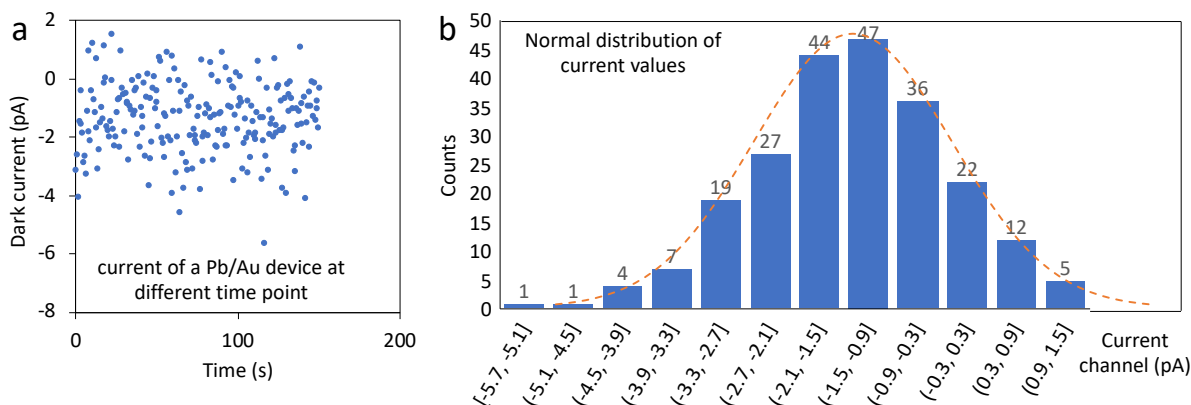

**Figure S9. Statistical distribution of the current values.** **a.** dark current of a Pb/Au device measured as a function of time. The measurement was performed at 0V to avoid the interference of dark current drift. **b.** Current value distribution fitting to Normal distribution, supporting the assumption of Normal distribution.
